# COVID-19 pandemic dynamics in India and impact of the SARS-CoV-2 Delta (B.1.617.2) variant

Wan Yang<sup>1\*</sup> and Jeffrey Shaman<sup>2</sup>

<sup>1</sup>Department of Epidemiology, <sup>2</sup>Department of Environmental Health Sciences, Mailman School of Public Health, Columbia University, New York, NY, USA

\*Correspondence to: [wy2202@cumc.columbia.edu](mailto:wy2202@cumc.columbia.edu)

## Abstract

The Delta SARS-CoV-2 variant has spread quickly since first being identified. To better understand its epidemiological characteristics and impact, we utilize multiple datasets and comprehensive model-inference methods to reconstruct COVID-19 pandemic dynamics in India, where Delta first emerged. Using model-inference estimates from March 2020 to May 2021, we estimate the Delta variant can escape adaptive immunity induced by prior wildtype infection roughly half of the time and is around 60% more infectious than wildtype SARS-CoV-2. In addition, our analysis suggests that the recent case decline in India was likely due to implemented non-pharmaceutical interventions and weather conditions less conducive for SARS-CoV-2 transmission during March – May, rather than high population immunity. Model projections show infections could resurge as India enters its monsoon season, beginning June, if intervention measures are lifted prematurely.

## Main text

The Delta variant (PANGO lineage: B.1.617.2) is a SARS-CoV-2 variant of concern (VOC) as classified by the World Health Organization (WHO) and several governments.<sup>1-4</sup> First identified in December 2020 in India, Delta has spread quickly to over 60 countries (GISAID,<sup>5</sup> as of June 16, 2021), likely due to its ability to evade immunity from prior wildtype infection and higher transmissibility. Laboratory studies have found varying levels of neutralizing ability for prior convalescent sera and vaccinee sera against Delta, ranging from similar potency<sup>6,7</sup> to a 5.0-6.9 fold reduction.<sup>8</sup> Field observations have shown a lower vaccine efficacy (VE) for the 1<sup>st</sup> vaccine dose against Delta (VE = ~34% vs. ~51% against Alpha, for the BNT162b2 and ChAdOx1 vaccines) but similar VE after the 2<sup>nd</sup> vaccine dose.<sup>9</sup> In addition, epidemiological studies in the UK found a higher secondary attack rate<sup>2</sup> and growth rate<sup>10</sup> for Delta than the Alpha variant, explaining its rapid rise and displacement of Alpha in the UK. However, not all places have experienced the same rapid variant displacement (e.g., thus far the Beta variant remains the dominant variant in South Africa during its ongoing 3<sup>rd</sup> pandemic wave<sup>11</sup>) and in India, the second pandemic wave caused by Delta has started to decline after several weeks of intense transmission. To better understand the epidemiological characteristics and impact of Delta, here we utilize multiple datasets and comprehensive modeling to reconstruct COVID-19 pandemic dynamics in India during March 2020 – May 2021 and quantify the immune escape potential and transmissibility for Delta. We also use model projections to examine the potential impact of Delta in India over the next 6 months.

### 43 **The first COVID-19 pandemic wave in India, March 2020 – January 2021**

44 From January 2020 to January 2021 India recorded over 10 M COVID-19 cases (0.77% of its  
45 population); however, a nationwide serology survey suggested that ~24% of its population had  
46 been infected by December 2020.<sup>12</sup> Accounting for under-detection of infection (Fig S1),  
47 implemented non-pharmaceutical interventions (NPIs), seasonality, and vaccination, we used a  
48 model-inference system to reconstruct pandemic dynamics in India since March 2020 (Fig 1A).  
49 Model-estimated infection rates closely match with measurements from three nationwide  
50 serologic surveys conducted during the early, mid, and late phases of the first pandemic wave  
51 (Fig 1B). Our analysis indicates that the 2-month long national lockdown (March 24 – May 31,  
52 2020) and the less favorable weather conditions during summer (i.e., March – May) at the time  
53 likely contributed to the low infection rates initially. By mid-May 2020, the model-inference  
54 system estimates that only 0.32% (95% CrI: 0.07 – 1.2%) of the population had been infected  
55 [vs. 0.73% (95% CI: 0.34%, 1.13%) among adults estimated by serosurvey<sup>13</sup>]. As the country  
56 lifted its lockdown in June 2020 and entered the monsoon season (June – September) when  
57 conditions are likely more favorable for transmission (Fig 1C), the first pandemic wave began.  
58 Nevertheless, continued regional restrictions during June – November 2020 and less favorable  
59 weather conditions during the autumn (October – November; see mobility and seasonal trends  
60 in Fig 1C) likely mitigated pandemic intensity. The estimated mean of the reproduction number  
61  $R_t$  (i.e., average number of secondary infections per primary infection) was above 1 but less  
62 than 1.3 from early June to mid-September; in addition,  $R_t$  dropped transiently below 1 during  
63 October – November (Fig 1D). By the end of January 2021 when case rates reached a minimum  
64 following the first wave, the model-inference system estimates that 25.1% (95% CrI: 15.3 –  
65 37.3%) of the population had been infected (Fig 1B).

### 67 **The second pandemic wave in India and estimated epidemiological characteristics of Delta**

68 Unexpectedly, infections resurged dramatically in late March 2021 largely due to the rise of the  
69 Delta variant. Despite a weeks-long second national lockdown implemented beginning April 20,  
70 2021, India reported another 17 million cases during March – May 2021, about twice the  
71 number reported during the previous 14 months. Accounting for under-detection (Fig S1), we  
72 estimate that 26.3% (95% CrI; 15.6 – 46.2%) of the population were infected during this 3-  
73 month period, including reinfections. This intense transmission was likely facilitated by the  
74 higher transmissibility as well as immune evasive nature of the Delta variant. Estimated  
75 transmissibility increased substantially during the second pandemic wave (Fig 1E). In addition,  
76 estimated population susceptibility increased at the start of the second pandemic wave (Fig 1F),  
77 suggesting loss of population immunity against Delta. Due to this immune escape, an estimated  
78 61.8% (95% CrI: 36.8 – 83.9%) of the population remained susceptible at the end of May 2021,  
79 despite two large pandemic waves and rollout of mass-vaccination (of note, 13% of the  
80 population had received at least 1 dose of vaccine by the end of May 2021). These findings  
81 along with the seasonal trends described above suggest that the decline of the second wave  
82 was largely due to the NPIs implemented and less favorable weather conditions during March –  
83 May, rather than high population immunity.

84  
85 Combining the model-inference estimates during the first and second pandemic waves in India,  
86 we estimated that Delta was able to escape immunity from prior wildtype infection 45.8% (95%

87 CI: 0 – 67.6%) of the time and was 60.1% (95% CI: 46.0 – 80.8%) more infectious than wildtype  
88 SARS-CoV-2.

89

### 90 **Implications for COVID-19 dynamics in India**

91 Given the estimated seasonal trends, population susceptibility, and epidemiological  
92 characteristics of Delta, we used the calibrated model to project pandemic dynamics in India  
93 over the next 6 months (i.e. June – November 2021) under different intervention and  
94 vaccination scenarios. We considered 3 NPI scenarios: i) gradual reopening starting June 2021  
95 and resuming all activities by mid-July 2021; ii) delaying the reopening by 4 weeks; and iii)  
96 delaying the reopening by 8 weeks. In addition, for each NPI scenario, we considered 3  
97 vaccination scenarios: i) current vaccination rate based on data from May 2021; ii) increasing  
98 the vaccination rate to twice the current rate; and iii) increasing the vaccination rate to four  
99 times of the current rate. For all vaccination scenarios, we assumed up to 80% of the  
100 population would be vaccinated (of note, ~24% of India’s population is below 12 years of age,  
101 an age cut-off for COVID-19 vaccination in some countries at present).

102

103 Model projections indicate that, as India enters its monsoon season (June – September) with  
104 weather conditions more favorable for transmission, infections could resurge, causing a third  
105 wave of magnitude similar to the second wave, if NPIs are lifted starting in June (Fig 2; 1<sup>st</sup>  
106 column); accelerating the rollout of mass-vaccination (up to 4 times the current rate) could  
107 temper the peak burden but likely would not be sufficient to prevent this resurgence  
108 (comparing the different colored lines in Fig 2; 1<sup>st</sup> column). In contrast, delaying the easing of  
109 NPIs could allow India to mitigate the higher transmission risk during the monsoon season and  
110 substantially reduce the peak burden. Combining a delay of 4 weeks with a much faster  
111 vaccination rollout (e.g., 4 times the current rate) and very high vaccination coverage could help  
112 to keep infection rates at levels similar to those observed during late May 2021 (Fig 2, 2<sup>nd</sup>  
113 column, blue lines). However, without a faster vaccination rollout, a delay of reopening by 8  
114 weeks may be needed to keep infection rates at the current level (Fig 2, 3<sup>rd</sup> column).

115

### 116 **Discussion**

117 Combining epidemiological, behavioral, and weather observational data with a comprehensive  
118 model-inference system, we estimate that the Delta SARS-CoV-2 variant can escape immunity  
119 from prior wildtype infection roughly half of the time and is around 60% more infectious than  
120 wildtype SARS-CoV-2. In addition, our analysis suggests that the recent case decline in India was  
121 likely due to the lockdown and weather conditions less conducive for SARS-CoV-2 transmission  
122 during March – May. As India enters its monsoon season starting in June, infections could  
123 resurge if intervention measures are lifted prematurely.

124

125 Previously, we have estimated the changes in transmissibility and immune escape potential for  
126 three other major SARS-CoV-2 VOCs: namely, a 46.6% (95% CI: 32.3 – 54.6%) increase in  
127 transmissibility but nominal immune escape for Alpha (i.e., B.1.1.7), a 32.4% (95% CI: 14.6 –  
128 48.0%) increase in transmissibility and 61.3% (95% CI: 42.6 – 85.8%) immune escape for Beta  
129 (i.e., B.1.351), and a 43.3% (95% CI: 30.3 – 65.3%) increase in transmissibility and 52.5% (95%  
130 CI: 0 – 75.8%) immune escape for Gamma (i.e., P.1). Compared with Alpha, the estimated

131 transmissibility for Delta is around 10-20% higher, in addition to a more pronounced ability to  
132 evade immunity from wildtype infection. Data from the UK have shown that the secondary  
133 attack rate for contacts of cases with Delta was around 1.5 times higher than Alpha (12.4% vs.  
134 8.2%), during March 29 – May 11, 2021.<sup>2</sup> In a partially immunized population, the secondary  
135 attack rate reflects the combined outcome of the transmissibility of the etiologic agent and  
136 population susceptibility to that agent. Our estimates of the relative transmissibility and  
137 immune escape potential for Delta and Alpha are thus in line with these reported secondary  
138 attack rates (i.e., combining the 10-20% increase in transmissibility with <~50% increase in  
139 susceptibility due to immune evasion for prior natural infection and, to a lesser extent,  
140 vaccination). This higher competitiveness of Delta over Alpha thus explains the rapid variant  
141 displacement observed in the UK, which may occur in other regions with similar variant  
142 prevalence. Compared to Beta and Gamma, the estimated transmissibility for Delta is higher  
143 but the estimated immune escape potential is lower. In combination, Delta may be similarly or  
144 more competitive than Beta and Gamma. As a result, the future dynamics of Delta in regions  
145 with high current Beta/Gamma prevalence are less clear, and continued monitoring of all these  
146 variants is warranted.

147  
148 Our analyses here also point to the important dynamic interactions with disease seasonality.  
149 While the model used to estimate COVID-19 seasonal trends was developed for influenza;<sup>14</sup>  
150 studies have shown a similar impact of humidity and temperature on SARS-CoV-2 transmission  
151 as observed for influenza.<sup>15,16</sup> In addition, our previous estimates for Beta and South Africa  
152 using the same model appear to have been borne out by observations from South Africa – that  
153 the decline during the second wave was in part due to less conducive weather conditions  
154 during summer and that infections could resurge (which is indeed occurring) during winter. For  
155 India, the model estimates two seasons (i.e., the monsoon season during June – September and  
156 winter during December – January) would experience higher virus transmission; this seasonality  
157 in combination with the implemented NPIs explain much of the COVID-19 pandemic dynamics  
158 observed thus far in India. Using this seasonality, our model estimates and projections suggest  
159 that, similar to South Africa, a third wave is possible when India enters the more transmission-  
160 favorable monsoon season starting in June. To mitigate the risk of this resurgence, continued  
161 NPIs would be needed in addition to a fast rollout of mass-vaccination.

162  
163 Due to a lack of detailed epidemiological data (e.g., age-specific and subnational) and thus  
164 model simplification, our estimates have large uncertainties as indicated by the large  
165 confidence intervals. Nevertheless, these estimates are in line with independent data from  
166 three nationwide serology surveys conducted at three time points during the first pandemic  
167 wave in India (Fig 1B), as well as contact tracing data from the UK,<sup>2</sup> as discussed above; these  
168 consistencies support the accuracy of our estimates. Unlike estimates from the contact tracing  
169 data, however, here we are able to separately quantify the changes in transmissibility and  
170 immune escape potential of the Delta variant. These estimates could support better  
171 understanding of future SARS-CoV-2 variant dynamics given local prior infection rates, variant  
172 prevalence, and vaccination coverage. Overall, our findings suggest Delta remains a major  
173 public health threat in India, despite the recent intense pandemic wave caused by this variant  
174 and the declining trend. Given its high transmissibility and immune escape potential, it is also

175 critical that other regions prepare for the potential impact of Delta in the coming weeks or  
176 months.

177

## 178 **METHODS**

### 179 **Data sources and processing**

180 We used reported COVID-19 case and mortality data to capture transmission dynamics,  
181 weather data to estimate disease seasonality, mobility data to represent concurrent NPIs, and  
182 vaccination data to account for changes in population susceptibility due to vaccination in the  
183 model-inference system. COVID-19 case and mortality data from the week of March 8, 2020  
184 (the first week COVID-19 deaths were reported in India) to the week of May 30, 2021 came  
185 from the COVID-19 Data Repository of the Center for Systems Science and Engineering (CSSE) at  
186 Johns Hopkins University.<sup>17,18</sup> Surface station temperature and relative humidity were derived  
187 from the Integrated Surface Dataset (ISD) maintained by the National Oceanic and Atmospheric  
188 Administration (NOAA) and were accessed using the “stationaRy” R package.<sup>19,20</sup> We computed  
189 specific humidity using temperature and relative humidity per the Clausius-Clapeyron  
190 equation.<sup>21</sup> We then aggregated these data for all weather stations in India (n = 498 stations)  
191 with measurements since 2000 and calculated the average for each week of the year during  
192 2000-2020. Mobility data were derived from Google Community Mobility Reports;<sup>22</sup> we  
193 aggregated all business-related categories (i.e., retail and recreational, transit stations, and  
194 workplaces) in all locations in India to weekly intervals. Vaccination data (1<sup>st</sup> and 2<sup>nd</sup> dose) were  
195 obtained from Our World in Data.<sup>23,24</sup>

196

### 197 **Model-inference system**

198 The model-inference system was developed and described in detail in our previous study.<sup>25</sup> In  
199 brief, we computed the disease seasonal trend (i.e., the relative reproduction number for each  
200 week of the year; see Fig 1C), based on temperature and specific humidity and parameter  
201 estimates from Yuan et al.<sup>14</sup> These estimates were then incorporated into a susceptible-  
202 exposed-infectious-removed-susceptible-vaccination (SEIRSV) model to account for disease  
203 seasonality. The model also used observed mobility data to account for ongoing NPIs and  
204 included an infection-detection-rate parameter to account for under-detection. The SEIRSV  
205 model was run in conjunction with the ensemble Kalman adjustment filter (EAKF)<sup>26</sup> – a Bayesian  
206 inference method – and weekly case and mortality data to examine multiple potential  
207 combinations of changes in transmissibility and immune escape potential. The most plausible  
208 combination was then identified based on model goodness-of-fit and accuracy of one-step-  
209 ahead predictions. Importantly, as the model-inference system decouples the effects on  
210 transmission dynamics due to changing population susceptibility, NPIs, seasonality, and variant-  
211 specific transmissivity, it is able to estimate the *variant-specific* transmissibility (i.e., after  
212 removing the effects of the former three factors; vs.  $R_t$  combining all factors; Fig 1 E vs. D) as  
213 well as immune escape potential. This model-inference system has been validated using  
214 model-generated synthetic datasets where the true parameter values are known, as well as by  
215 comparing model estimates for the UK, South Africa, and Brazil – the three countries where the  
216 Alpha, Beta, and Gamma variants were first identified – to available independent observations  
217 from each country. For details on model validation, the SEIRSV model, and the EAKF filtering

218 process, please see the main text and supplement of Yang and Shaman.<sup>25</sup> To account for model  
219 stochasticity, we repeated the model-inference process 100 times, each with 500 model  
220 realizations and summarized the results from all 50,000 model estimates.

221

### 222 **Model validation using independent data**

223 To compare model estimates with independent observations not assimilated into the model-  
224 inference system, we identified three measurements of cumulative infection rates from three  
225 nationwide serology surveys in India: i) the first national serosurvey conducted during May 11 –  
226 June 4, 2020 (n = 28,000 adults 18 years or older);<sup>13</sup> ii) the second national serosurvey  
227 conducted during August 18 – September 20, 2020 (n = 29,082 individuals 10 years or older);<sup>27</sup>  
228 and iii) the third national serosurvey conducted during December 18, 2020 – January 6, 2021 (n  
229 = 28,598 individuals 10 years or older).<sup>28</sup> To account for the delay in antibody generation, we  
230 shifted the timing of each serosurvey 14 days when comparing survey results to model-  
231 inference system estimates of cumulative infection rates in Fig 1B.

232

### 233 **Model projection**

234 Model projections of infections (including asymptomatic and mild cases not reported as cases),  
235 reported cases, and reported deaths were generated by integrating the SEIRSV model forward  
236 stochastically for 6 months beginning the week of June 6, 2021. Model-inference estimates  
237 made at the week of May 30, 2021 (e.g., population susceptibility and the transmissibility of  
238 Delta) were used to initialize the model ensemble. For the three NPI scenarios tested, we used  
239 the changes in population mobility as a proxy and projected mobility as follows. For the first  
240 scenario assuming reopening starting in June 2021, we used mobility data in May 2021 (i.e. the  
241 most recent 4 weeks) in a linear regression model to estimate the weekly increase in mobility  
242 and then extrapolated this trend to project mobility in future weeks, capping it at the maximum  
243 level observed during March 2020 – May 2021. For the NPI scenario assuming a 4 (or 8) week  
244 delay of reopening, we kept mobility during the first 4 (or 8) weeks at the same level as the  
245 week of May 30, 2021 and projected values for the following weeks as in the first NPIs scenario.  
246 For the three vaccination scenarios tested, we averaged the reported vaccination rate (i.e.,  
247 number of doses given per week) in May 2021 (i.e. the most recent 4 weeks) to compute the  
248 baseline vaccination rate; of note, the vaccination rate for the 2<sup>nd</sup> dose was very low in May; we  
249 thus instead set it to one-third of the vaccination rate reported for the 1<sup>st</sup> vaccine dose. For a  
250 vaccination rate of 2 (or 4) times current rates, we multiplied the baseline rates by 2 (or 4). For  
251 all vaccination scenarios, we assumed up to 80% of population would be vaccinated. At  
252 present the Covaxin and Oxford/AstraZeneca vaccines are used in India, we thus assumed a VE  
253 of 33% fourteen days after the 1<sup>st</sup> dose and 60% seven days after the 2<sup>nd</sup> dose based on VE data  
254 for the AstraZeneca vaccine against Delta.<sup>9</sup> As for the model-inference runs, we repeated the  
255 projections for each scenario 100 times (each with 500 model realizations) and summarized the  
256 projections from all 50,000 runs.

257

258

259 **Data Availability:** All data used in this study are publicly available as described in the “Data  
260 sources and processing” section.

261

262 **Code availability:** All source code and data necessary for the replication of our results and  
263 figures will be made publicly available.

264

265 **Acknowledgements:** This study was supported by the National Institute of Allergy and  
266 Infectious Diseases (AI145883 and AI163023), the National Science Foundation Rapid Response  
267 Research Program (RAPID; DMS-2027369) and a gift from the Morris-Singer Foundation.

268

269 **Competing interests:** JS and Columbia University disclose partial ownership of SK Analytics. JS  
270 discloses consulting for BNI.

## 271 **References:**

272

- 273 1 World Health Organization. *Tracking SARS-CoV-2 variants*,  
274 [<https://www.who.int/en/activities/tracking-SARS-CoV-2-variants/>](https://www.who.int/en/activities/tracking-SARS-CoV-2-variants/) (2021).
- 275 2 Public Health England. *SARS-CoV-2 variants of concern and variants under investigation*  
276 *in England. Technical briefing 14*,  
277 [https://assets.publishing.service.gov.uk/government/uploads/system/uploads/attach  
278 ment\\_data/file/991343/Variants\\_of\\_Concern\\_VOC\\_Technical\\_Briefing\\_14.pdf](https://assets.publishing.service.gov.uk/government/uploads/system/uploads/attachment_data/file/991343/Variants_of_Concern_VOC_Technical_Briefing_14.pdf) (2021).
- 279 3 National Collaborating Centre for Infectious Diseases. *Updates on COVID-19 Variants of*  
280 *Concern*, <https://nccid.ca/covid-19-variants/> (2021).
- 281 4 Centers for Disease Control and Prevention. *SARS-CoV-2 Variant Classifications and*  
282 *Definitions*, <https://www.cdc.gov/coronavirus/2019-ncov/variants/variant-info.html>  
283 (2021).
- 284 5 (GISAID), G. I. o. S. A. I. D. *Tracking of Variants*, [https://www.gisaid.org/hcov19-  
285 variants/](https://www.gisaid.org/hcov19-variants/) (2021).
- 286 6 Yadav, P. D. *et al.* Neutralization of variant under investigation B.1.617 with sera of  
287 BBV152 vaccinees. *bioRxiv*, 2021.2004.2023.441101, doi:10.1101/2021.04.23.441101  
288 (2021).
- 289 7 Liu, J. *et al.* BNT162b2-elicited neutralization of B.1.617 and other SARS-CoV-2 variants.  
290 *Nature*, doi:10.1038/s41586-021-03693-y (2021).
- 291 8 Wall, E. C. *et al.* Neutralising antibody activity against SARS-CoV-2 VOCs B.1.617.2 and  
292 B.1.351 by BNT162b2 vaccination. *Lancet*, doi:10.1016/S0140-6736(21)01290-3 (2021).
- 293 9 Bernal, J. L. *et al.* Effectiveness of COVID-19 vaccines against the B.1.617.2 variant.  
294 *medRxiv*, 2021.2005.2022.21257658, doi:10.1101/2021.05.22.21257658 (2021).
- 295 10 Challen, R. *et al.* Early epidemiological signatures of novel SARS-CoV-2 variants:  
296 establishment of B.1.617.2 in England. *medRxiv*, 2021.2006.2005.21258365,  
297 doi:10.1101/2021.06.05.21258365 (2021).
- 298 11 NextStrain.org. *Genomic epidemiology of novel coronavirus - Africa-focused*  
299 *subsampling*, [https://nextstrain.org/ncov/africa?f\\_country=South%20Africa](https://nextstrain.org/ncov/africa?f_country=South%20Africa) (2021).

- 300 12 Murhekar, M. V. *et al.* SARS-CoV-2 seroprevalence among the general population and  
301 healthcare workers in India, December 2020–January 2021. *Int. J. Infect. Dis.* **108**, 145-  
302 155, doi:<https://doi.org/10.1016/j.ijid.2021.05.040> (2021).
- 303 13 Murhekar, M. V. *et al.* Prevalence of SARS-CoV-2 infection in India: Findings from the  
304 national serosurvey, May-June 2020. *Indian Journal of Medical Research* **152**, 48-57,  
305 doi:10.4103/ijmr.IJMR\_3290\_20 (2020).
- 306 14 Yuan, H., Kramer, S. C., Lau, E. H. Y., Cowling, B. J. & Yang, W. Modeling influenza  
307 seasonality in the tropics and subtropics. *PLoS Comput Biol* **17**, e1009050,  
308 doi:10.1371/journal.pcbi.1009050 (2021).
- 309 15 Ma, Y., Pei, S., Shaman, J., Dubrow, R. & Chen, K. Role of meteorological factors in the  
310 transmission of SARS-CoV-2 in the United States. *Nat Commun* **12**, 3602,  
311 doi:10.1038/s41467-021-23866-7 (2021).
- 312 16 Ravelli, E. & Gonzales Martinez, R. Environmental risk factors of airborne viral  
313 transmission: Humidity, Influenza and SARS-CoV-2 in the Netherlands. *Spatial and*  
314 *Spatio-temporal Epidemiology*, 100432, doi:<https://doi.org/10.1016/j.sste.2021.100432>  
315 (2021).
- 316 17 *COVID-19 Data Repository by the Center for Systems Science and Engineering (CSSE) at*  
317 *Johns Hopkins University*, <<https://github.com/CSSEGISandData/COVID-19>> (2021).
- 318 18 Dong, E., Du, H. & Gardner, L. An interactive web-based dashboard to track COVID-19 in  
319 real time. *The Lancet. Infectious diseases* **20**, 533-534, doi:10.1016/S1473-  
320 3099(20)30120-1 (2020).
- 321 19 Iannone, R. *Package 'stationaRy'*, <[https://cran.r-](https://cran.r-project.org/web/packages/stationaRy/stationaRy.pdf)  
322 [project.org/web/packages/stationaRy/stationaRy.pdf](https://cran.r-project.org/web/packages/stationaRy/stationaRy.pdf)> (2020).
- 323 20 Iannone, R. *stationaRy*, <<https://github.com/rich-iannone/stationaRy>> (2020).
- 324 21 Wallace, J. & Hobbs, P. *Atmospheric Science: An Introductory survey*. 2nd Edition edn,  
325 (Academic Press, 2006).
- 326 22 Google Inc. *Community Mobility Reports*, <<https://www.google.com/covid19/mobility/>>  
327 (2020).
- 328 23 *Data on COVID-19 (coronavirus) vaccinations by Our World in Data*,  
329 <<https://github.com/owid/covid-19-data/tree/master/public/data/vaccinations>> (2020).
- 330 24 Mathieu, E. *et al.* A global database of COVID-19 vaccinations. *Nature Human Behaviour*,  
331 doi:10.1038/s41562-021-01122-8 (2021).
- 332 25 Yang, W. & Shaman, J. Epidemiological characteristics of three SARS-CoV-2 variants of  
333 concern and implications for future COVID-19 pandemic outcomes. *medRxiv*,  
334 2021.2005.2019.21257476, doi:10.1101/2021.05.19.21257476 (2021).
- 335 26 Anderson, J. L. An Ensemble Adjustment Kalman Filter for Data Assimilation. *Mon.*  
336 *Weather Rev.* **129**, 2884-2903, doi:10.1175/1520-0493(2001)129<2884:aeakff>2.0.co;2  
337 (2001).
- 338 27 Murhekar, M. V. *et al.* SARS-CoV-2 antibody seroprevalence in India, August-September,  
339 2020: findings from the second nationwide household serosurvey. *The Lancet Global*  
340 *Health* **9**, e257-e266, doi:10.1016/S2214-109X(20)30544-1 (2021).
- 341 28 Murhekar, M. V. *et al.* SARS-CoV-2 seroprevalence among the general population and  
342 healthcare workers in India, December 2020 - January 2021. *Int. J. Infect. Dis.* **108**, 145-  
343 155, doi:10.1016/j.ijid.2021.05.040 (2021).
- 344



**Fig 1.** Model-inference estimates and validation. (A) Model fit. (B) Model validation. (C) Observed relative mobility and estimated disease seasonal trend, compared to case and death rates over time. Key model-inference estimates are shown for the real-time reproduction number  $R_t$  (D), transmissibility (E), and population susceptibility (F). Blue lines and surrounding areas show the estimated mean, 50% (dark) and 95% (light) CrIs. Boxes and whiskers show the estimated mean, 50% and 95% CrIs for weekly cases and deaths in (A) and infection rates in (D) – (F). Grey shaded areas indicate the timing of national lockdowns (darker) or local restrictions (lighter); horizontal arrows indicate the timing of variant identification and vaccination rollout. In (C), for mobility (blue line; y-axis), values below 1 (dashed horizontal line) indicate reductions due to public health interventions. For the disease seasonal trend (orange line; y-axis), values above 1 indicate weather conditions more conducive for transmission than the yearly average and *vice versa*. *Note that the transmissibility estimates have removed the effects of changing population susceptibility, NPIs, and disease seasonality; thus, the trends are more stable than the reproduction number ( $R_t$ ; left column) and reflect changes in variant-specific properties.*

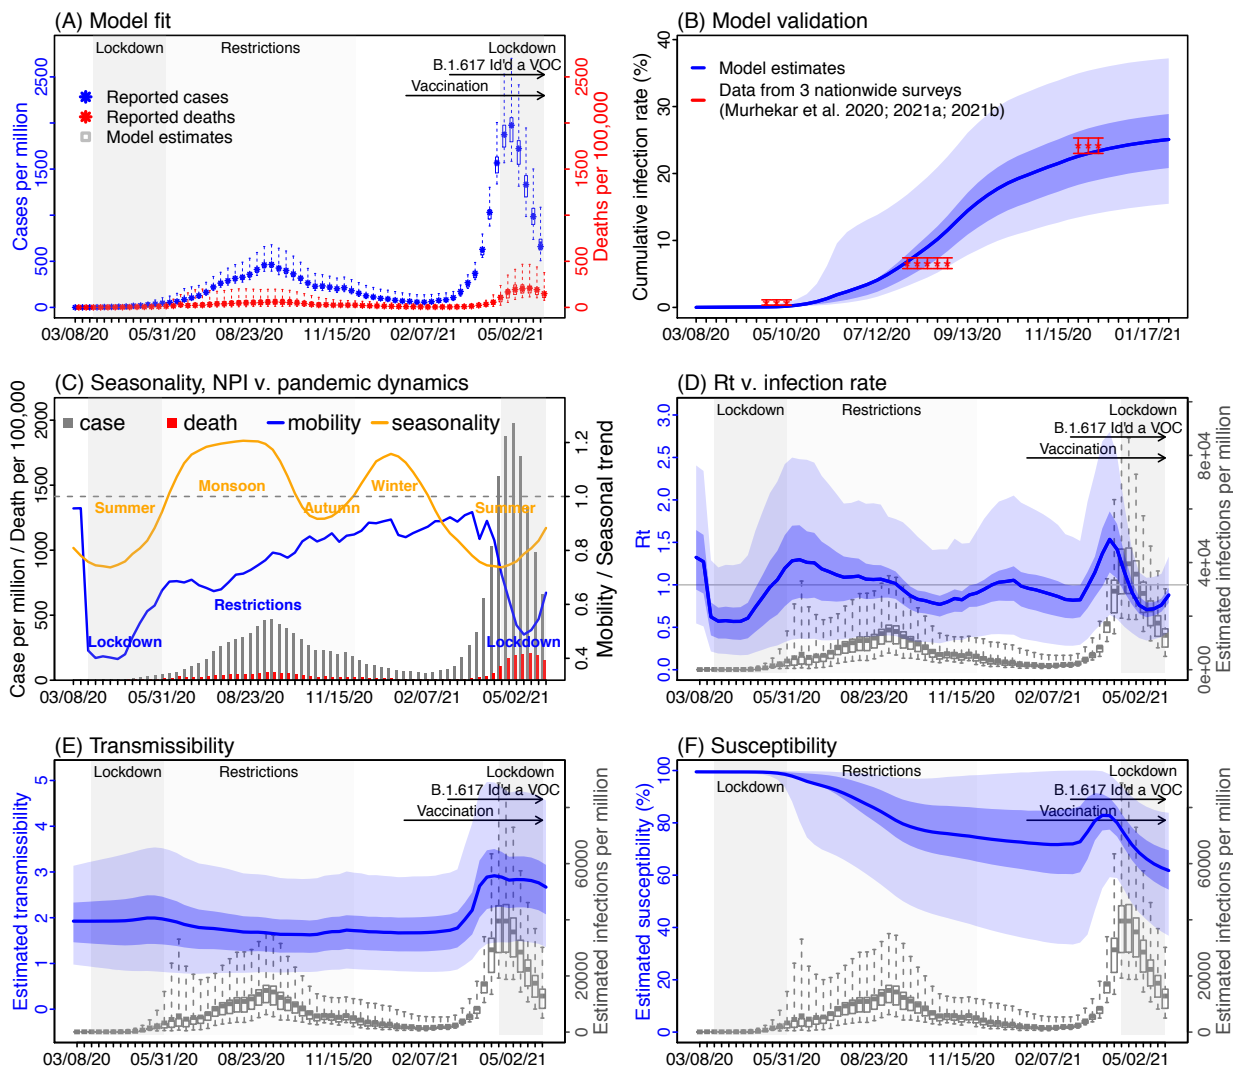

**Fig 2.** Model projections of weekly number of infections (A), reported cases (B) and reported deaths (C) for India during June – November 2021, under different scenarios of NPIs and vaccination rates. All numbers are scaled per one million people. Lines show the projected median and shaded areas show projected interquartile ranges.

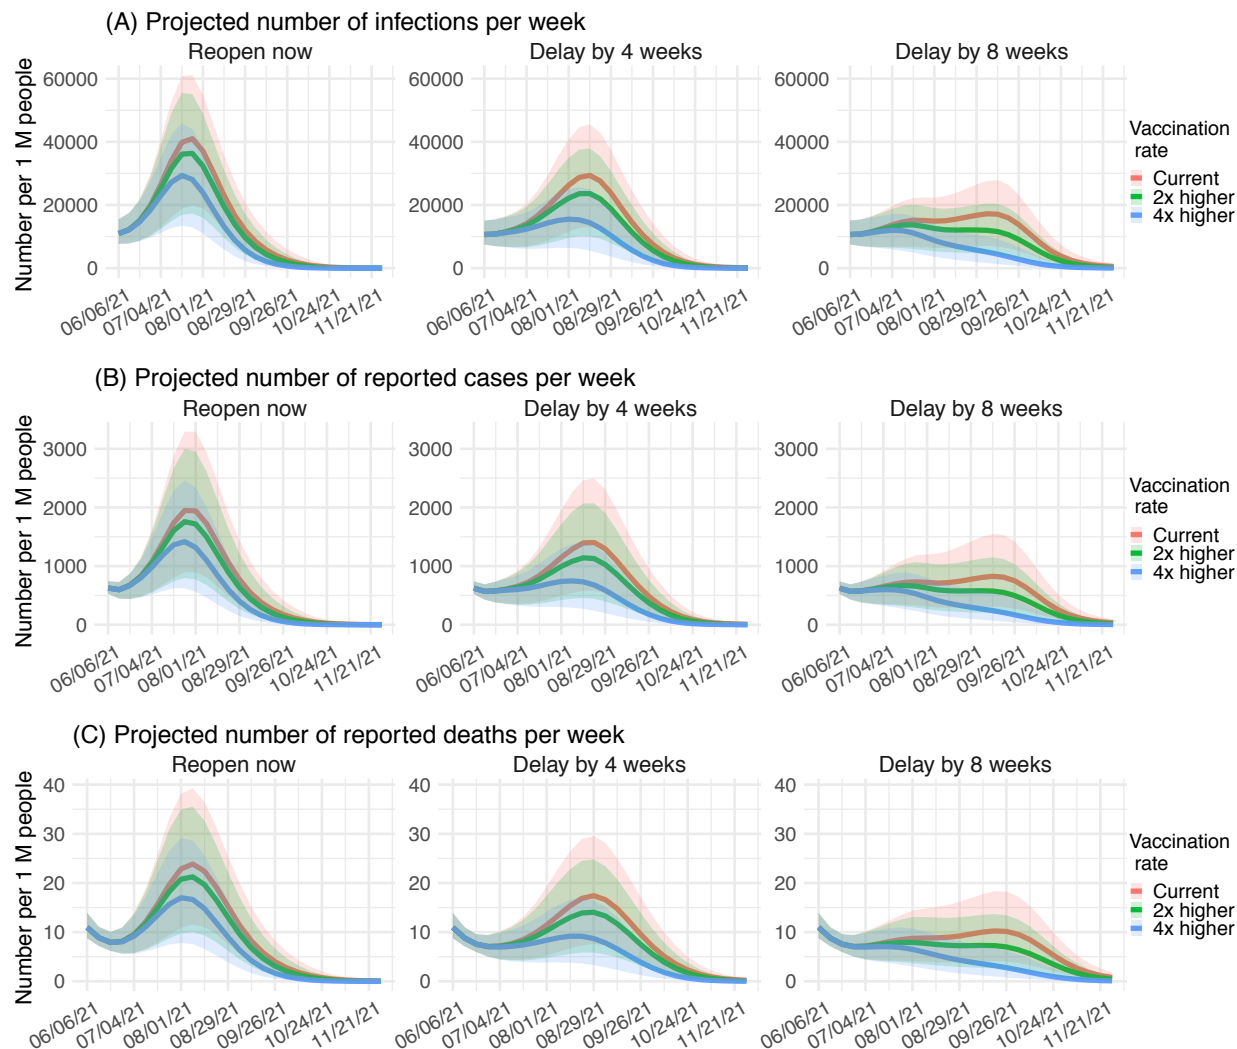

**Fig S1.** Estimated infection-detection rate (A) and infection-fatality risk (B) during each week of the study period. For comparison, estimated weekly infection rates are superimposed in each plot (right y-axis). Blue lines and surrounding areas show model estimated mean, 50% and 95% CrIs. Boxes and whiskers show model-estimated weekly infection rates (mean, 50% and 95% CrIs). Grey shaded boxes indicate the timing of lockdowns (darker) or local restrictions (lighter); horizontal arrows indicate the timing of variant identification and vaccination rollout. *Note that infection-fatality risk estimates were based on reported COVID-19 deaths and may not reflect the true values due to the likely under-reporting of COVID-19 deaths.*

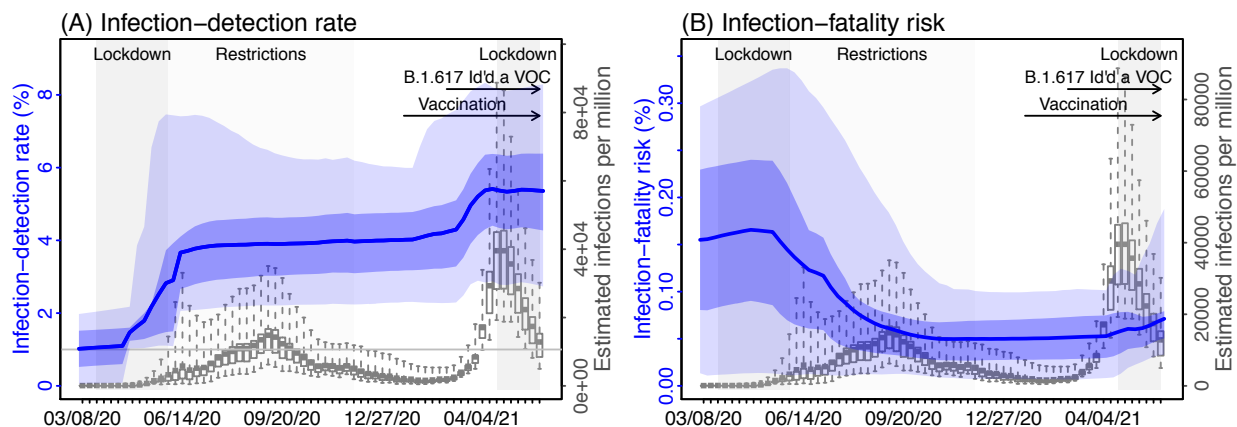

Source: https://medrxiv.org/content/10.1101/2021.06.21.21259268v1.full.pdf
